# Supplementary material for: A Prospective, Monocentric Case-Control Study on Uncontrolled Psoriasis as Independent Risk Factor for a Hypercoagulable State
Source: Springer Nature journal article supplement (doi:10.1007/s13555-024-01126-y), 2024-03-01
Supplement: MOESM1 [file 26829872]

**A prospective, monocentric case-control study on uncontrolled psoriasis as independent risk factor for a hypercoagulable state**

Tom M Hillary<sup>1</sup>MD, Tine Vanhoutvin<sup>1</sup>, Miet Peeters<sup>2</sup>, Maya Imbrechts<sup>2</sup>PhD, Thomas Vanassche<sup>3</sup>MD,PhD Marjan Garmyn<sup>1</sup>MD,PhD, Séverine Vermeire<sup>4</sup> MD,PhD

<sup>1</sup>: Dermatology department, University Hospitals Leuven, Herestraat 49, 3000, Leuven, Belgium

<sup>2</sup>: KU Leuven, Laboratory for Therapeutic and Diagnostic Antibodies, Department of Pharmaceutical and Pharmacological Sciences, Leuven, Belgium

<sup>3</sup>: Department of Cardiovascular Diseases, University Hospitals Leuven, Herestraat 49, 3000, Leuven, Belgium

<sup>4</sup>: Department of Gastroenterology & Hepatology, University Hospitals Leuven and Translational Research in Gastrointestinal Disorders (TARGID) KU Leuven, Belgium

Corresponding author: Tom Hillary

Herestraat 49

3000 Leuven

Belgium

+32 16 33 79 50

Tom.Hillary@uzleuven.be

## Appendix A

|           | 50%CLT_BL | 50%CLT_FU | P-value       |
|-----------|-----------|-----------|---------------|
| IL-17 inh | 146,4     | 151,8     | 0,0509        |
| IL-23 inh | 142,6     | 188,6     | <b>0,0007</b> |
| Systemics | 150,6     | 168,6     | 0,8196        |
| TNF inh   | 131,3     | 152,3     | 0,5231        |

**Appendix A:** treatment with selective IL23-antibodies was associated with a significantly prolonged 50%CLT ( $p=0.0007$ ). This was not observed in the other treatment groups. IL: interleukin; inh: inhibitor; TNF: Tumor necrosis factor  $\alpha$ .

## Appendix B

| <b>BSA&gt;15</b>      | <b>mean</b> | <b>Q1</b> | <b>Q3</b> | <b>p</b>         |
|-----------------------|-------------|-----------|-----------|------------------|
| AUC % HC              | 213.1       | 134.2     | 281.3     |                  |
| AUC % Pso             | 294.8       | 185.0     | 381.2     | <i>0.0003</i>    |
| Amplitude % HC        | 136.4       | 114.3     | 154.8     |                  |
| Amplitude % Pso       | 161.1       | 144.0     | 177.5     | <i>&lt;.0001</i> |
| <b>BSA&gt;20</b>      |             |           |           |                  |
| AUC % HC              | 207.3       | 140.0     | 269.1     |                  |
| AUC % Pso             | 293.6       | 232.7     | 325.9     | <i>0.0019</i>    |
| Amplitude % HC        | 140.6       | 116.8     | 158.4     |                  |
| Amplitude % Pso       | 165.2       | 142.0     | 178.6     | <i>0.0049</i>    |
| <b>BSA&gt;15</b>      |             |           |           |                  |
| AUC % Baseline        | 294.8       | 185.0     | 381.2     |                  |
| AUC % Follow-up       | 324.9       | 189.2     | 406.8     | <i>0.3743</i>    |
| Amplitude % Baseline  | 161.1       | 144.0     | 177.5     |                  |
| Amplitude % Follow-up | 154.7       | 125.9     | 172.2     | <i>0.0378</i>    |
| <b>BSA&gt;20</b>      |             |           |           |                  |
| AUC % Baseline        | 293.6       | 232.7     | 325.9     |                  |
| AUC % Follow-up       | 314.5       | 194.4     | 404.3     | <i>0.8084</i>    |
| Amplitude % Baseline  | 165.2       | 142.0     | 178.6     |                  |
| Amplitude % Follow-up | 153.9       | 132.9     | 170.8     | <i>0.0084</i>    |

**Appendix B:** Increasing the threshold of BSA to 15% or 20% did not alter the effect on amplitude or AUC. HC: healthy control; Pso: psoriasis; BSA: body surface area.
